# Supplementary material for: Considerations and consequences of allowing DNA sequence data as types of fungal taxa
Source: PubMed Central journal article supplement — IMA Fungus. 2018 May 24;9(1):167–75. doi: 10.5598/imafungus.2018.09.01.10 (PMC6048565; doi:10.5598/imafungus.2018.09.01.10), 2018-05-24
Supplement: ima9_167_SD1.pdf [file ima9_167_SD1.pdf]

Supplementary Table 1.

| Name                        | Affiliation                                                                                                                                                                                             |
|-----------------------------|---------------------------------------------------------------------------------------------------------------------------------------------------------------------------------------------------------|
| Slavomír Adamčík            | Institute of Botany, Plant Science and Biodiversity Centre, Slovak Academy of Sciences, Dúbravská cesta 9, 845 23 Bratislava, Slovakia                                                                  |
| Teuvo Ahti                  | Finnish Museum of Natural History, P.O. Box 7, 00014 University of Helsinki, Finland                                                                                                                    |
| M. Catherine Aime           | Purdue University, 915 W. State St., West Lafayette, Indiana 47907, U.S.A.                                                                                                                              |
| A. Martyn Ainsworth         | Royal Botanic Gardens, Kew, Richmond, Surrey, TW9 3AB, United Kingdom                                                                                                                                   |
| László Albert               | Hungarian Mycological Society, 1087 Könyves Kálmán krt. 40, Budapest, Hungary                                                                                                                           |
| Edgardo Albertó             | Instituto de Investigaciones Biotecnológicas-Instituto Tecnológico de Chascomús, Universidad Nacional de San Martín-Consejo Nacional de Investigaciones Científicas y Técnicas, Buenos Aires, Argentina |
| Alberto Altés García        | Facultad de Biología, Ciencias Ambientales y Química, Universidad de Alcalá, 28805 Alcalá de Henares, Madrid, Spain                                                                                     |
| Dmitry Ageev                | SIGNATEC Ltd., 630090, Novosibirsk, Akademgorodok (Novosibirsk Scientific Center), Inzhenernaya str., 22, Russia                                                                                        |
| Reinhard Agerer             | Ludwig-Maximilians-Universität München, Menzinger Str. 67, 80638 München, Germany                                                                                                                       |
| Begona Aguirre-Hudson       | Royal Botanic Gardens, Kew, Richmond, Surrey, TW9 3AB, United Kingdom                                                                                                                                   |
| Joe Ammirati                | University of Washington, Seattle, Washington 98195-1800, U.S.A.                                                                                                                                        |
| Harry Andersson             | Eichhahnweg 29a, 38108 Braunschweig, Germany                                                                                                                                                            |
| Claudio Angelini            | Jardín Botánico Nacional Dr. Rafael Ma. Moscoso, Apartado 21-9, Santo Domingo, Dominican Republic                                                                                                       |
| Vladimír Antonín            | Moravian Museum, Zeny trh 6, 659 37 Brno, Czech Republic                                                                                                                                                |
| Takayuki Aoki               | Genetic Resources Center, National Agriculture and Food Research Organization, 2-1-2 Kannondai, Tsukuba, Ibaraki 305-8602, Japan                                                                        |
| André Aptroot               | ABL Herbarium, G.v.d.Veenstraat 107, 3762 XK Soest, The Netherlands                                                                                                                                     |
| Didier Argaud               | 40 rue du Justemont, 57290 Fameck, France                                                                                                                                                               |
| Blanca Imelda Arguello Sosa | Instituto Tecnológico de Ciudad Victoria, Tecnológico Nacional de México, Ciudad Victoria, Tamaulipas, Mexico                                                                                           |
| Arne Aronsen                | Torødveien 54, 3135 Torød, Norway                                                                                                                                                                       |
| Ulf Arup                    | Biological Museum, Lund University, Box 117, 221 00 Lund, Sweden                                                                                                                                        |
| Bitá Asgari                 | Iranian Research Institute of Plant Protection, Agricultural Research, Education and Extension Organization, Tehran, Iran                                                                               |
| Boris Assyov                | Institute of Biodiversity and Ecosystem Research, Bulgarian Academy of Sciences, 2 Gagarin Str., 1113 Sofia, Bulgaria                                                                                   |
| Violeta Atienza             | Facultad de Ciencias Biológicas, Universitat de València, C/Dr Moliner 50, 46100, Burjasot, Valencia, Spain                                                                                             |
| Ditte Bandini               | Panoramastr 47, 69257 Wiesenbach, Germany                                                                                                                                                               |
| João Luís Baptista-Ferreira | Instituto de Biosistemas e Ciências Integrativas, Faculdade de Ciências da Universidade de Lisboa, 1749-016 Lisboa, Portugal                                                                            |
| Hans-Otto Baral             | Blaihofstr. 42, 72074 Tübingen, Germany                                                                                                                                                                 |
| Tim Baroni                  | The State University of New York, 340 Bowers Hall, P.O. Box 2000, Cortland, New York 13045, U.S.A.                                                                                                      |
| Robert Weingart Barreto     | Universidade Federal de Viçosa, 36570-000, Viçosa, Minas Gerais, Brazil                                                                                                                                 |
| Henry Beker                 | (1) Royal Holloway, University of London, United Kingdom; (2) Botanic Garden Meise, Nieuwelaan 38, 1860 Meise, Belgium                                                                                  |
| Ann Bell                    | 45 Gurney Road, Lower Hutt, New Zealand                                                                                                                                                                 |
| Jean-Michel Bellanger       | CEFE UMR5175, CNRS, Université de Montpellier, Université Paul-Valéry Montpellier, EPHE, INSERM, 1919 Route de Mende, 34293 Montpellier Cédex 5, France                                                 |
| Francesco Bellù             | Naturmuseum of Bolzano, CP 104, 39100, Bolzano, Italy                                                                                                                                                   |
| Martin Bemmann              | Kleingemünderstraße 111, 69118 Heidelberg, Germany                                                                                                                                                      |
| Mika Bendiksby              | NTNU, University Museum, Norwegian University of Science and Technology, 7491 Trondheim, Norway                                                                                                         |
| Egil Bendiksen              | Norwegian Institute for Nature Research, Gaustadalleen 21, 0349 Oslo, Norway                                                                                                                            |
| Katriina Bendiksen          | Natural History Museum, University of Oslo, P.O. Box 1172 Blindern, 0318 Oslo, Norway                                                                                                                   |
| Lajos Benedek               | Szent Istvan University, Hungary                                                                                                                                                                        |
| Anna Bérešová-Guttová       | Institute of Botany, Plant Science and Biodiversity Centre, Slovak Academy of Sciences, Dúbravská cesta 9, 845 23 Bratislava, Slovakia                                                                  |
| Franz Berger                | University of Salzburg, Salzburg, Austria                                                                                                                                                               |
| Reinhard Berndt             | Herbaria Z+ZT, ETH Zürich, CHN D37, Universitätstr. 16, 8092 Zürich, Switzerland                                                                                                                        |
| Annarosa Bernicchia         | Via A. Guidotti 39, 40134 Bologna, Italy                                                                                                                                                                |
| Alona Yu. Biketova          | Institute of Biochemistry, BRC-HAS, 6726 Szeged, Temesvari krt. 62, 6726 Szeged, Hungary                                                                                                                |

|                            |                                                                                                                                                                                                             |
|----------------------------|-------------------------------------------------------------------------------------------------------------------------------------------------------------------------------------------------------------|
| Enrico Bizio               | Società Veneziana di Micologia, Società Veneziana di Scienze Naturali, Fontego dei Turchi, Santa Croce 1730, 30135 Venice, Italy                                                                            |
| Curtis Bjork               | UBC Herbarium, Beaty Biodiversity Museum, University of British Columbia, Canada                                                                                                                            |
| Teun Boekhout              | (1) Westerdijk Fungal Biodiversity Institute, P.O. Box 85167, 3508 AD, Utrecht, The Netherlands; (2) Institute for Biodiversity and Ecosystem Dynamics, University of Amsterdam, Amsterdam, The Netherlands |
| David Boertmann            | Aarhus University, Frederiksborgvej 399, 4000 Roskilde, Denmark                                                                                                                                             |
| Tanja Böhning              | AG Geobotanik Schleswig-Holstein & Hamburg, c/o University of Kiel, Olshausenstraße 75, 24098 Kiel, Germany                                                                                                 |
| Florent Boittin            | Ascomycete.org, 36 rue de la Garde, 69005 Lyon, France                                                                                                                                                      |
| Carlos G. Boluda           | Conservatoire et Jardin botaniques de la Ville de Genève, 1292 Genève, Switzerland                                                                                                                          |
| Menno W. Boomsliuter       | T.v.Lohuizenstraat 34, 8172xl, Vaassen, The Netherlands                                                                                                                                                     |
| Jan Borovička              | Institute of Geology, Czech Academy of Sciences, Rozvojova 269, 165 00 Prague 6, Czech Republic                                                                                                             |
| Tor Erik Brandrud          | Norwegian Institute for Nature Research, Gaustadalleen 21, 0349 Oslo, Norway                                                                                                                                |
| Uwe Braun                  | Martin-Luther-Universität, Institut für Biologie, Bereich Geobotanik, und Botanischer Garten, Herbarium, Neuwerk 21, 06099 Halle, Germany                                                                   |
| Irwin Brodo                | Canadian Museum of Nature, 240 McLeod Street, Ottawa, Ontario, Canada                                                                                                                                       |
| Tatiana Bulyonkova         | A.P. Ershov Institute of Informatics Systems, Russian Academy of Sciences, Siberian Branch, 6 Acad. Lavrentjev pr., Novosibirsk 630090, Russia                                                              |
| Harold H. Burdsall Jr.     | Fungal & Decay Diagnostics, LLC, 9350 Union Valley Road, Black Earth, Wisconsin 53515, U.S.A.                                                                                                               |
| Bart Buyck                 | Muséum National d'Histoire Naturelle, CP 39, ISYEB, UMR 7205 CNRS MNHN UPMC EPHE, 12 rue Buffon, 75005 Paris, France                                                                                        |
| Ana Rosa Burgaz            | Facultad de Ciencias Biológicas, Universidad Complutense de Madrid, 28040 Madrid, Spain                                                                                                                     |
| Vicent Calatayud           | Fundación CEAM, c/ Charles R. Darwin, 14, Parque Tecnológico, 46980 Paterna, Valencia, Spain                                                                                                                |
| Philippe Callac            | INRA, MycSA, CS 20032, 33882 Villenave d'Ornon, France                                                                                                                                                      |
| Emanuele Campo             | Associazione Micologica Bresadola, Via Alessandro Volta 46, 38123 Trento, Italy                                                                                                                             |
| Massimo Candusso           | Via Ottone Primo 90, 17021, Alassio, Savona, Italy                                                                                                                                                          |
| Brigitte Capoen            | Queffioec, rue de Saint Gonval, 22710 Penvenan, France                                                                                                                                                      |
| Joaquim Carbó              | Roser, 60, 17257 Torroella de Montgrí, Girona, Spain                                                                                                                                                        |
| Matteo Carbone             | Via Don Luigi Sturzo 173 16148 Genova, Italy                                                                                                                                                                |
| Rafael F. Castañeda-Ruiz   | Instituto de Investigaciones Fundamentales en Agricultura, Tropical 'Alejandro de Humboldt', OSDE, Grupo Agrícola, Calle 1 Esq. 2, Santiago de Las Vegas, C. Habana 17200, Cuba                             |
| Michael A. Castellano      | USDA, Forest Service, Northern Research Station, Corvallis, Oregon 97330, U.S.A.                                                                                                                            |
| Jie Chen                   | Mae Fah Luang University, Chang Wat Chiang Rai 57100, Thailand                                                                                                                                              |
| Philippe Clerc             | Conservatoire et Jardin botaniques de la Ville de Genève, 1292 Genève, Switzerland                                                                                                                          |
| Giovanni Consiglio         | Via C. Ronzani 61, 40033 Casalecchio Bologna, Italy                                                                                                                                                         |
| Gilles Corriol             | National Botanical Conservatory for Pyrenees and Midi-Pyrénées Region of France and BBF Herbarium, Vallon de Salut. B.P. 315. 65203 Bagnères-de-Bigorre, France                                             |
| Régis Courtecuisse         | Université Lille, Fac. Pharma. Lille, EA4483 IMPECS, 59000 Lille, France                                                                                                                                    |
| Ana Crespo                 | Facultad de Farmacia, Universidad Complutense de Madrid, 28040 Madrid, Spain                                                                                                                                |
| Cathy Cripps               | Plant Sciences & Plant Pathology, 119 Plant Biosciences Building, Montana State University, Bozeman, Montana 59717, U.S.A.                                                                                  |
| Pedro W. Crous             | Westerdijk Fungal Biodiversity Institute, P.O. Box 85167, 3508 AD, Utrecht, The Netherlands                                                                                                                 |
| Gladstone Alves da Silva   | Universidade Federal de Pernambuco, Centro de Biociências, Avenida da Engenharia, S/N, Cidade Universitária, Recife, Pernambuco, Brazil                                                                     |
| Meiriele da Silva          | Universidade Federal de Viçosa, 36570-000, Viçosa, Minas Gerais, Brazil                                                                                                                                     |
| Marjo Dam                  | Hooischelf 13, 6581 SL Malden, The Netherlands                                                                                                                                                              |
| Nico Dam                   | Hooischelf 13, 6581 SL Malden, The Netherlands                                                                                                                                                              |
| Frank Dämmrich             | The Bavarian Natural History Collections (SNSB Munich), Menzinger Strasse 71, 80638, München, Germany                                                                                                       |
| Kanad Das                  | Botanical Survey of India, Cryptogamic Unit, P.O. Botanic Garden, Howrah 711103, W.B., India                                                                                                                |
| Linda Davies               | Centre for Environmental Policy, Imperial College London, SW7 2AZ, United Kingdom                                                                                                                           |
| Eske De Crop               | Ghent University K.L. Ledeganckstraat 35, 9000 Ghent, Belgium                                                                                                                                               |
| Andre De Kesel             | Botanic Garden Meise, Nieuwelaan 38, 1860 Meise, Belgium                                                                                                                                                    |
| Ruben De Lange             | Ghent University, K.L. Ledeganckstraat 35, 9000 Gent, Belgium                                                                                                                                               |
| Bárbara De Madrigal Bonzi  | Instituto de Botánica del Nordeste, Universidad Nacional de Nordeste-Consejo Nacional de Investigaciones Científicas y Técnicas, Sargento Cabral 2131, CC 209, Corrientes Capital, Argentina                |
| Thomas Edison E. dela Cruz | University of Santo Tomas, Espana 1008 Manila, Philippines                                                                                                                                                  |

|                                    |                                                                                                                                                                                                     |
|------------------------------------|-----------------------------------------------------------------------------------------------------------------------------------------------------------------------------------------------------|
| Lynn Delgat                        | Ghent University, K.L. Ledeganckstraat 35, 9000 Gent, Belgium                                                                                                                                       |
| Vincent Demoulin                   | Institut de Botanique, B.22, Université de Liège, 4000 Liège I, Belgium                                                                                                                             |
| Dennis E. Desjardin                | HD Thiers Herbarium (SFSU), San Francisco State University, 1600 Holloway Ave, San Francisco, California 94132, U.S.A.                                                                              |
| Paul Diederich                     | Musée national d'histoire naturelle, 25 rue Münster, 2160 Luxembourg, Luxembourg                                                                                                                    |
| Bálint Dima                        | (1) Institute of Biology, Eötvös Loránd University, Pázmány Péter sétány 1/c, 1117 Budapest, Hungary; (2) Viikki Plant Science Centre, University of Helsinki, P.O. Box 65, 00014 Helsinki, Finland |
| Maria Martha Dios                  | Facultad de Ciencias Exactas y Naturales, Universidad Nacional de Catamarca, Av Belgrano 300, 4700 San Fernando del Valle de Catamarca, Argentina                                                   |
| Pradeep Kumar Divakar              | Facultad de Farmacia, Universidad Complutense de Madrid, 28040 Madrid, Spain                                                                                                                        |
| Clovis Douanla-Meli                | Julius Kühn-Institut, Federal Research Centre for Cultivated Plants, Institute for National and International Plant Health, Messeweg 11-12, 38104 Braunschweig, Germany                             |
| Brian Douglas                      | Royal Botanic Gardens, Kew, Richmond, Surrey, TW9 3AB, United Kingdom                                                                                                                               |
| Elisandro Ricardo Drechsler-Santos | Universidade Federal de Santa Catarina, Campus Universitário Reitor João David Ferreira Lima, Trindade, Florianópolis, Santa Catarina CEP 88040-900, Brazil                                         |
| Paul S. Dyer                       | School of Life Sciences, University of Nottingham, University Park, Nottingham NG7 2RD, United Kingdom                                                                                              |
| Ursula Eberhardt                   | Abt. Botanik, Staatliches Museum für Naturkunde Stuttgart, Rosenstein 1, 70191 Stuttgart, Germany                                                                                                   |
| Damien Ertz                        | Botanic Garden Meise, Nieuwelaan 38, 1860 Meise, Belgium                                                                                                                                            |
| Fernando Esteve-Raventós           | Facultad de Biología, Ciencias Ambientales y Química, Universidad de Alcalá, 28805 Alcalá de Henares, Madrid, Spain                                                                                 |
| Javier Angel Etayo Salazar         | Navarro Villoslada 16, 3ª dcha., 31003 Pamplona, Navarra, Spain                                                                                                                                     |
| Vera Evenson                       | Sam Mitchel Herbarium of Fungi, Denver Botanic Gardens, 1007 York Street, Denver, Colorado 80206, U.S.A.                                                                                            |
| Guillaume Eyssartier               | Muséum national d'histoire naturelle, Jardin des plantes, 57 rue Cuvier, 75005 Paris, France                                                                                                        |
| Edit Farkas                        | Institute of Ecology and Botany, MTA Centre for Ecological Research, 2163 Vácrátót, Hungary                                                                                                         |
| Alain Favre                        | Fédération Mycologique et Botanique Dauphiné Savoie, Le Prieuré, 144 Place de l'Eglise, 74320 Sevrier, France                                                                                       |
| Anna G. Fedosova                   | Komarov Botanical Institute of the Russian Academy of Sciences, 2 Prof. Popov Street, St. Petersburg, 197376, Russia                                                                                |
| Mario Filippa                      | Regione Monsarineri 36, 14041 Agliano Terme, Italy                                                                                                                                                  |
| Péter Finy                         | 8000 Székesfehérvár, Zsombolyai u. 56, Hungary                                                                                                                                                      |
| Adam Flakus                        | W. Szafer Institute of Botany, Polish Academy of Sciences, Lubicz 46, 31-512 Krakow, Poland                                                                                                         |
| Simón Fos                          | Facultad de Ciencias Biológicas, Universitat de València, C/Dr Moliner 50, 46100, Burjassot, Valencia, Spain                                                                                        |
| Jacques Fournier                   | Las Muros, F. 09420 Rimont, France                                                                                                                                                                  |
| André Fraiture                     | Botanic Garden Meise, Nieuwelaan 38, 1860 Meise, Belgium                                                                                                                                            |
| Paolo Franchi                      | Associazione Micologica Bresadola, Via Alessandro Volta 46, 38123 Trento, Italy                                                                                                                     |
| Ana Esperanza Franco Molano        | Escuela de Microbiología, Universidad de Antioquia, AA1226, Fundación Biodiversa Colombia, Medellín, Colombia                                                                                       |
| Gernot Friebes                     | Centre of Natural History, Botany & Mycology, Universalmuseum Joanneum, Weinzöttlstraße 16, 8045 Graz, Austria                                                                                      |
| Andreas Frisch                     | NTNU, University Museum, Norwegian University of Science and Technology, 7491 Trondheim, Norway                                                                                                     |
| Alan Fryday                        | Michigan State University, East Lansing, Michigan 48824, U.S.A.                                                                                                                                     |
| Giuliana Furci                     | The Fungi Foundation, Paseo Bulnes 79 of. 112A, Santiago, Chile                                                                                                                                     |
| Ricardo Galán Márquez              | Facultad de Biología, Ciencias Ambientales y Química, Universidad de Alcalá, 28805 Alcalá de Henares, Madrid, Spain                                                                                 |
| Matteo Garbelotto                  | University of California, 130 Mulford Hall #3114 Berkeley, California 94720, U.S.A.                                                                                                                 |
| Joaquina Maria Garcia-Martin       | Real Jardín Botánico-CSIC, Plaza de Murillo 2, 28014, Madrid, Spain                                                                                                                                 |
| Mónica A. García Otálora           | Herbaria Z+ZT, ETH Zürich, CHN D37, Universitätstr. 16, 8092 Zürich, Switzerland                                                                                                                    |
| Dania García Sánchez               | Universitat Rovira i Virgili, C/ Sant Llorenç 21, 43201 Reus, Tarragona, Spain                                                                                                                      |
| Alain Gardiennet                   | 14 rue Roulette, 21260 Véronnes, France                                                                                                                                                             |
| Sigisfredo Garnica                 | Instituto de Bioquímica y Microbiología, Universidad Austral de Chile, Isla Teja Campus, Casilla 567, Valdivia, Chile                                                                               |
| Isaac Garrido Benavent             | Real Jardín Botánico-CSIC, Plaza de Murillo 2, 28014, Madrid, Spain                                                                                                                                 |
| Genevieve Gates                    | Tasmanian Institute of Agriculture, Private Bag 54, Hobart, Tasmania 7001, Australia                                                                                                                |
| Alice da Cruz Lima Gerlach         | Conservatoire et Jardin Botaniques de la ville de Genève, Genève, Switzerland                                                                                                                       |
| Masoomeh Ghobad-Nejhad             | Iranian Research Organization for Science and Technology, P.O. Box 15815-3538, Tehran 15819, Iran                                                                                                   |

|                              |                                                                                                                                                        |
|------------------------------|--------------------------------------------------------------------------------------------------------------------------------------------------------|
| Tatiana B. Gibertoni         | Universidade Federal de Pernambuco, Centro de Biociências, Avenida da Engenharia, S/N, Cidade Universitária, Recife, Pernambuco, Brazil                |
| Tine Grebenc                 | Slovenian Forestry Institute, Vecna pot 2, 100 Ljubljana, Slovenia                                                                                     |
| Irmgard Greilhuber           | University of Vienna, Rennweg 14, 1030 Vienna, Austria                                                                                                 |
| Bella Grishkan               | Institute of Evolution, University of Haifa, Aba Khoushi Ave. 199, Mt. Carmel, Haifa 3498838, Israel                                                   |
| Johannes Z. Groenewald       | Westerdijk Fungal Biodiversity Institute, P.O. Box 85167, 3508 AD, Utrecht, The Netherlands                                                            |
| Martin Grube                 | Institute of Biology, University of Graz, Holteiasse 6, 8010 Graz, Austria                                                                             |
| Gérald Gruhn                 | Office National des Forêts, 2 Avenue de Saint-Mandé, 75570 Paris Cedex 12, France                                                                      |
| Cécile Gueidan               | CSIRO - Australian National Herbarium, Clunies Ross Street, Canberra ACT 2601, Australia                                                               |
| Gro Gulden                   | Natural History Museum, University of Oslo, P.O. Box 1172 Blindern, 0318 Oslo, Norway                                                                  |
| Luis FP Gusmão               | Universidade Estadual de Feira de Santana, Av. Transnordestina, s/n, Bairro Novo Horizonte, CEP:44036-900, Feira de Santana, Bahia, Brazil             |
| Josef Hafellner              | Institute of Biology, University of Graz, Holteiasse 6, 8010 Graz, Austria                                                                             |
| Michel Hairaud               | 2 Impasse des Marronniers, 79360 Poivendre de Marigny, France                                                                                          |
| Marek Halama                 | Museum of Natural History, Wrocław University, ul. H. Sienkiewicza 5, 50-335 Wrocław, Poland                                                           |
| Nils Hallenberg              | University of Gothenburg, Box 461, 40530 Göteborg, Sweden                                                                                              |
| Roy E. Halling               | Institute of Systematic Botany, New York Botanical Garden, 2900 Southern Blvd, Bronx, New York 10458-5126, U.S.A.                                      |
| Karen Hansen                 | Swedish Museum of Natural History, P.O. Box 50007, 104 05 Stockholm, Sweden                                                                            |
| Christoffer Bugge Harder     | Texas Tech University, Box 42122, Lubbock, Texas 79409, U.S.A.                                                                                         |
| Jacob Heilmann-Clausen       | Natural History Museum of Denmark, Universitetsparken 15, 2100 København, Denmark                                                                      |
| Stip Helleman                | Sweelinck 78, 5831KT Boxmeer, The Netherlands                                                                                                          |
| Alain Henriot                | Mycological Society of France, 20 rue Rottembourg, 12th arrondissement, Paris, France                                                                  |
| Margarita Hernandez-Restrepo | Westerdijk Fungal Biodiversity Institute, P.O. Box 85167, 3508 AD, Utrecht, The Netherlands                                                            |
| Raphaël Herve                | 24 rue des Fougères, 86550 Mignaloux-Beauvoir, France                                                                                                  |
| Caroline Hobart              | 84 Stafford Road, Sheffield, South Yorkshire S2 2SF, United Kingdom                                                                                    |
| Mascha Hoffmeister           | Julius Kühn-Institut, Institute for Epidemiology and Pathogen Diagnostics, Braunschweig, Germany                                                       |
| Klaus Høiland                | University of Oslo, P.O.Box 1066, Blindern, 0316 Oslo, Norway                                                                                          |
| Jan Holec                    | National Museum, Herbarium PRM, Cirkusová 1740, 193 00 Praha 9, Czech Republic                                                                         |
| Håkon Holien                 | Faculty of Bioscience and Aquaculture, NORU University, P.O. Box 2501, 7729 Steinkjer, Norway                                                          |
| Karen Hughes                 | University of Tennessee, Knoxville, Tennessee 37996, U.S.A.                                                                                            |
| Vít Hubka                    | Faculty of Science, Charles University, Benátská 2, 128 01 Praha 2, Czech Republic                                                                     |
| Seppo Huhtinen               | Herbarium TUR, Biodiversity Unit, University of Turku, 20014 Turku, Finland                                                                            |
| Boris Ivančević              | Natural History Museum, Njegoševa 51, P.O. Box 401, 11000 Belgrade, Serbia                                                                             |
| Marian Jagers                | Reelaan 13, 7522 LR Enschede, The Netherlands                                                                                                          |
| Walter Jaklitsch             | Institute of Forest Entomology, Forest Pathology and Forest Protection, University of Natural Resources and Life Sciences Vienna, Vienna, Austria      |
| AnnaElise Jansen             | Stationsstraat 10, 6701 AM Wageningen, the Netherlands                                                                                                 |
| Ruvishika S. Jayawardena     | Mae Fah Luang University, Chang Wat Chiang Rai 57100, Thailand                                                                                         |
| Thomas Stjernegaard Jeppesen | Global Biodiversity Information Facility, Universitetsparken 15, 2100 København Ø, Denmark                                                             |
| Mikael Jeppson               | Lilla Håjumsgatan 4, 46135 Trollhättan, Sweden                                                                                                         |
| Peter Johnston               | Manaaki Whenua Landcare Research, Private Bag 92170, Auckland 1072, New Zealand                                                                        |
| Per Magnus Jørgensen         | University of Bergen, Allégaten 41, P.O. Box 7800, 5020 Bergen, Norway                                                                                 |
| Ingvar Kärnefelt             | Biological Museum, Lund University, Box 117, 221 00 Lund, Sweden                                                                                       |
| Liudmila B. Kalinina         | Komarov Botanical Institute of the Russian Academy of Sciences, 2 Prof. Popov Street, St. Petersburg, 197376, Russia                                   |
| Gintaras Kantvilas           | Tasmanian Herbarium (HO), Tasmanian Museum and Art Gallery, P.O. Box 5058, UTAS L.P.O., Sandy Bay, Tasmania 7005, Australia                            |
| Mitko Karadelev              | Institute of Biology, Faculty of Natural Science and Mathematics, Ss. Cyril and Methodius University, Arhimedova 5, 1000 Skopje, Republic of Macedonia |
| Taiga Kasuya                 | Faculty of Risk and Crisis Management, Chiba Institute of Science, 3 Shiomi-cho, Choshi, Chiba 288-0025, Japan                                         |
| Ivona Kautmanová             | Natural History Museum, Slovak National Museum, Bratislava, Slovakia                                                                                   |
| Richard W. Kerrigan          | RWK Research, Kittanning, Pennsylvania 16201, U.S.A.                                                                                                   |

|                                 |                                                                                                                                                                                                                        |
|---------------------------------|------------------------------------------------------------------------------------------------------------------------------------------------------------------------------------------------------------------------|
| Martin Kirchmair                | Institut für Mikrobiologie, Universität Innsbruck, Technikerstraße 25, 6020 Innsbruck, Austria                                                                                                                         |
| Anna Kiyashko                   | Komarov Botanical Institute of the Russian Academy of Sciences, 2 Prof. Popov Street, St. Petersburg, 197376, Russia                                                                                                   |
| Dániel G. Knapp                 | Institute of Biology, Eötvös Loránd University, Pázmány Péter sétány 1/c, 1117 Budapest, Hungary                                                                                                                       |
| Henning Knudsen                 | Natural History Museum of Denmark, Universitetsparken 15, 2100 København, Denmark                                                                                                                                      |
| Kerry Knudsen                   | Faculty of Environmental Sciences, University of Life Sciences at Prague, Prague, Czech Republic                                                                                                                       |
| Tommy Knutsson                  | Nedra Västerstad 111, 380 62 Mörbylånga, Sweden                                                                                                                                                                        |
| Miroslav Kolařík                | Institute of Microbiology ASCR, Videnska 1083, 142 20 Prague 4, Czech Republic                                                                                                                                         |
| Urmas Kõljalg                   | Institute of Ecology and Earth Sciences, 40 Lai Street, Tartu 51005, Estonia                                                                                                                                           |
| Alica Košuthová                 | Swedish Museum of Natural History, P.O. Box 50007, 104 05 Stockholm, Sweden                                                                                                                                            |
| Attila Koszka                   | Faculty of Agricultural and Environmental Sciences, Kaposvar University, 7400 Kaposvar, Hungary                                                                                                                        |
| Heikki Kotiranta                | Finnish Environment Institute, P.O. Box 140, 00251 Helsinki, Finland                                                                                                                                                   |
| Vera Kotkova                    | Komarov Botanical Institute of the Russian Academy of Sciences, 2 Prof. Popov Street, St. Petersburg, 197376, Russia                                                                                                   |
| Ondřej Koukol                   | Faculty of Science, Charles University, Benátská 2, 128 01 Praha 2, Czech Republic                                                                                                                                     |
| Jiří Kout                       | University of West Bohemia, Faculty of Education, Klatovska 51, 306 19 Pilsen, Czech Republic                                                                                                                          |
| Gábor M. Kovács                 | Institute of Biology, Eötvös Loránd University, Pázmány Péter sétány 1/c, 1117 Budapest, Hungary                                                                                                                       |
| Martin Kříž                     | Faculty of Science, Charles University, Benátská 2, 128 01 Praha 2, Czech Republic                                                                                                                                     |
| Åsa Krüys                       | Museum of Evolution, Uppsala University, Norbyvägen 16, 75236 Uppsala, Sweden                                                                                                                                          |
| Viktor Kučera                   | Institute of Botany, Plant Science and Biodiversity Centre, Slovak Academy of Sciences, Dúbravská cesta 9, 845 23 Bratislava, Slovakia                                                                                 |
| Linas Kudzma                    | 37 Maple Ave. Annandale, New Jersey 08801, U.S.A.                                                                                                                                                                      |
| Francisco Kuhar                 | Instituto Multidisciplinario de Biología Vegetal, Consejo Nacional de Investigaciones Científicas y Técnicas, Universidad Nacional de Córdoba, Casilla de Correo 495, 5000 Córdoba, Argentina                          |
| Martin Kukwa                    | Faculty of Biology, University of Gdańsk, Wita Stwosza 59, 80-308 Gdańsk, Poland                                                                                                                                       |
| T. K. Arun Kumar                | The Zamorin's Guruvayurappan College, Kozhikode, Kerala 673014, India                                                                                                                                                  |
| Vladimír Kunca                  | Technical University in Zvolen, Ul. T. G. Masaryka 24, 960 53 Zvolen, Slovakia                                                                                                                                         |
| Ivana Kušan                     | Ruđer Bošković Institute, Bijenička cesta 54, 10000 Zagreb, Croatia                                                                                                                                                    |
| Thomas W. Kuyper                | Wageningen University & Research, Droevendaalsesteeg 4, 6708 PB Wageningen, The Netherlands                                                                                                                            |
| Carlos Lado                     | Real Jardín Botánico-CSIC, Plaza de Murillo 2, 28014, Madrid, Spain                                                                                                                                                    |
| Thomas Læssøe                   | Natural History Museum of Denmark, Universitetsparken 15, 2100 København, Denmark                                                                                                                                      |
| Patrice Lainé                   | 123 rue Saint Antoine, 75004, Paris, France                                                                                                                                                                            |
| Ewald Langer                    | University of Kassel, Heinrich-Plett-Strasse 40, 34132 Kassel, Germany                                                                                                                                                 |
| Ellen Larsson                   | University of Gothenburg, Box 461, 40530 Göteborg, Sweden                                                                                                                                                              |
| Karl-Henrik Larsson             | Natural History Museum, University of Oslo, P.O. Box 1172 Blindern, 0318 Oslo, Norway                                                                                                                                  |
| Gary Laursen                    | Institute of Arctic Biology, University of Alaska Fairbanks, Fairbanks, Alaska 99775-7000, U.S.A.                                                                                                                      |
| Christian Lechat                | Ascofrance, 64 route de Chizé, 79360 Villiers en Bois, France                                                                                                                                                          |
| Serena Lee                      | Herbarium Singapore Botanic Gardens, National Parks Board, Singapore                                                                                                                                                   |
| James C. Lendemer               | (1) Institute of Systematic Botany, New York Botanical Garden, 2900 Southern Blvd, Bronx, New York 10458-5126, U.S.A.; (2) Graduate Center, City University of New York, 365 5th Ave, New York, New York 10016, U.S.A. |
| Laura Levin                     | University of Buenos Aires, Junin 956, 1113, Buenos Aires, Argentina                                                                                                                                                   |
| Uwe Lindemann                   | Landesmuseum für Naturkunde, Münster, Germany                                                                                                                                                                          |
| Håkan Lindström                 | Östansjö 150, 840 64 Kälarne, Sweden                                                                                                                                                                                   |
| Xingzhong Liu                   | Institute of Microbiology, Chinese Academy of Sciences, No 3 Park 1, Beichen West Road, Chaoyang District, Beijing 100101, China                                                                                       |
| Regulo Carlos Llerena Hernandez | Facultad de Ciencias Biológicas y Agropecuarias, Peñuela, Universidad Veracruzana, Amatlán de los Reyes, Ver., Mexico                                                                                                  |
| Esteve Llop                     | Facultat de Biologia, Universitat de Barcelona, Av. Diagonal, 643, 08028 Barcelona, Spain                                                                                                                              |
| Csaba Locsmándi                 | Hungarian Natural History Museum, 1087 Budapest, Hungary                                                                                                                                                               |
| Deborah Jean Lodge              | USDA Forest Service, NRS, P.O. Box 1377, Luquillo, Puerto Rico 00773-1377, U.S.A.                                                                                                                                      |
| Michael Loizides                | P.O. Box 58499, 3734 Limassol, Cyprus                                                                                                                                                                                  |
| László Lőkös                    | Hungarian Natural History Museum, 1087 Budapest, Hungary                                                                                                                                                               |

|                            |                                                                                                                                                                                                               |
|----------------------------|---------------------------------------------------------------------------------------------------------------------------------------------------------------------------------------------------------------|
| Jennifer Luangsa-ard       | National Center for Genetic Engineering and Biotechnology (BIOTEC), NSTDA, 113 Thailand Science Park, Phaholyothin Rd., Klong Nueng, Klong Luang, Pathum Thani 12120, Thailand                                |
| Matthias Lüderitz          | AG Geobotanik Schleswig-Holstein & Hamburg, c/o University of Kiel, Olshausenstraße 75, 24098 Kiel, Germany                                                                                                   |
| Thorsten Lumbsch           | Field Museum, 1400 S. Lake Shore Dr., Chicago, Illinois 60605, U.S.A.                                                                                                                                         |
| Matthias Lutz              | Institute of Evolution and Ecology, University of Tübingen, Auf der Morgenstelle 5, 72076 Tübingen, Germany                                                                                                   |
| Dan Mahoney                | Callaghan Innovation, 69 Gracefield Road, Lower Hutt 5010, New Zealand                                                                                                                                        |
| Ekaterina Malysheva        | Komarov Botanical Institute of the Russian Academy of Sciences, 2 Prof. Popov Street, St. Petersburg, 197376, Russia                                                                                          |
| Vera Malysheva             | Komarov Botanical Institute of the Russian Academy of Sciences, 2 Prof. Popov Street, St. Petersburg, 197376, Russia                                                                                          |
| Patinjareveettil Manimohan | University of Calicut, Kerala, 673 635, India                                                                                                                                                                 |
| Yasmina Marin-Felix        | Westerdijk Fungal Biodiversity Institute, P.O. Box 85167, 3508 AD, Utrecht, The Netherlands                                                                                                                   |
| Guilhermina Marques        | Centre for the Research and Technology of Agro-Environmental and Biological Sciences, University of Trás-os-Montes and Alto Douro, Laboratory of Mycology and Soil Microbiology, 5000-801 Vila Real, Portugal |
| Rubén Martínez-Gil         | Ascomycete.org, 36 rue de la Garde, 69005 Lyon, France                                                                                                                                                        |
| Guy Marson                 | Musée national d'histoire naturelle, 25 rue Münster, 2160 Luxembourg, Luxembourg                                                                                                                              |
| Gerardo Mata               | Instituto de Ecología, A.C., Carretera antigua a Coatepec 351, El Haya, Xalapa 91070, Veracruz, Mexico                                                                                                        |
| P. Brandon Matheny         | University of Tennessee, Knoxville, Tennessee 37996, U.S.A.                                                                                                                                                   |
| Geir Harald Mathiassen     | Tromsø University Museum, University of Tromsø - The Arctic University of Norway, 9037 Tromsø, Norway                                                                                                         |
| Neven Matočec              | Ruđer Bošković Institute, Bijenička cesta 54, 10000 Zagreb, Croatia                                                                                                                                           |
| Helmut Mayrhofer           | Institute of Biology, University of Graz, Holteiasse 6, 8010 Graz, Austria                                                                                                                                    |
| Mehdi Mehrabi              | Iranian Research Institute of Plant Protection, Agricultural Research, Education and Extension Organization, Tehran, Iran                                                                                     |
| Ireneia Melo               | Botanical Garden, National Museum of Natural History and Science, University of Lisbon, Portugal                                                                                                              |
| Armin Mešić                | Ruđer Bošković Institute, Bijenička cesta 54, 10000 Zagreb, Croatia                                                                                                                                           |
| Andrew S. Methven          | Savannah State University, Savannah, Georgia 31404, U.S.A.                                                                                                                                                    |
| Otto Miettinen             | Finnish Museum of Natural History, P.O. Box 7, 00014 University of Helsinki, Finland                                                                                                                          |
| Ana M. Millanes Romero     | Universidad Rey Juan Carlos, 28933 Móstoles, Madrid, Spain                                                                                                                                                    |
| Andrew N. Miller           | Illinois Natural History Survey, University of Illinois Urbana-Champaign, 1816 South Oak Street, Champaign, Illinois 61820-6970, U.S.A.                                                                       |
| James K. Mitchell          | Harvard University, 22 Divinity Avenue, Cambridge, Massachusetts 02138, U.S.A.                                                                                                                                |
| Roland Moberg              | Museum of Evolution, Uppsala University, Norbyvägen 16, 75236 Uppsala, Sweden                                                                                                                                 |
| Pierre-Arthur Moreau       | Université Lille, Fac. Pharma. Lille, EA4483 IMPECS, 59000 Lille, France                                                                                                                                      |
| Gabriel Moreno             | Facultad de Biología, Ciencias Ambientales y Química, Universidad de Alcalá, 28805 Alcalá de Henares, Madrid, Spain                                                                                           |
| Olga Morozova              | Komarov Botanical Institute of the Russian Academy of Sciences, 2 Prof. Popov Street, St. Petersburg, 197376, Russia                                                                                          |
| Asunción Morte             | Facultad de Biología, Universidad de Murcia, Campus de Espinardo, 30100 Murcia, Spain                                                                                                                         |
| Lucia Muggia               | University of Trieste, via L. Giorgieri 10, 34127 Trieste, Italy                                                                                                                                              |
| Guillermo Muñoz González   | Avda Valvanera N.32, 5D, 26500 Calahorra, La Rioja, Spain                                                                                                                                                     |
| Leena Myllys               | Finnish Museum of Natural History, P.O. Box 7, 00014 University of Helsinki, Finland                                                                                                                          |
| István Nagy                | Institute of Biology, Eötvös Loránd University, Pázmány Péter sétány 1/c, 1117 Budapest, Hungary                                                                                                              |
| László G. Nagy             | Institute of Biochemistry, BRC-HAS, 6726 Szeged, Temesvari krt. 62, 6726 Szeged, Hungary                                                                                                                      |
| Maria Alice Neves          | Universidade Federal de Santa Catarina, Campus Universitário Reitor João David Ferreira Lima, Trindade, Florianópolis, Santa Catarina CEP 88040-900, Brazil                                                   |
| Tuomo Niemelä              | Finnish Museum of Natural History, P.O. Box 7, 00014 University of Helsinki, Finland                                                                                                                          |
| Pier Luigi Nimis           | University of Trieste, via L. Giorgieri 10, 34127 Trieste, Italy                                                                                                                                              |
| Nicolas Niveiro            | Instituto de Botánica del Nordeste, Universidad Nacional de Nordeste-Consejo Nacional de Investigaciones Científicas y Técnicas, Sargento Cabral 2131, CC 209, Corrientes Capital, Argentina                  |
| Machiel E. Noordeloos      | Naturalis Biodiversity Center, P.O. Box 9517, 2300 RA, Leiden, The Netherlands                                                                                                                                |
| Anders Nordin              | Museum of Evolution, Uppsala University, Norbyvägen 16, 75236 Uppsala, Sweden                                                                                                                                 |
| Sara Raouia Noumeur        | Faculty of Natural and Life Sciences, University of Batna 2, 05000 Batna, Algeria                                                                                                                             |
| Yuri Novozhilov            | Komarov Botanical Institute of the Russian Academy of Sciences, 2 Prof. Popov Street, St. Petersburg, 197376, Russia                                                                                          |

|                                     |                                                                                                                                                                                                         |
|-------------------------------------|---------------------------------------------------------------------------------------------------------------------------------------------------------------------------------------------------------|
| Jorinde Nuytinck                    | Naturalis Biodiversity Center, P.O. Box 9517, 2300 RA Leiden, The Netherlands                                                                                                                           |
| Esteri Ohenoja                      | Botanical Museum, University of Oulu, Finland                                                                                                                                                           |
| Patricia Oliveira Fiuza             | Universidade Estadual de Feira de Santana, Av. Transnordestina, s/n, Bairro Novo Horizonte, CEP:44036-900, Feira de Santana, Bahia, Brazil                                                              |
| Alan Orange                         | National Museum of Wales, Cardiff CF10 3NP, United Kingdom                                                                                                                                              |
| Alexander Ordynets                  | University of Kassel, Heinrich-Plett-Strasse 40, 34132 Kassel, Germany                                                                                                                                  |
| Beatriz Ortiz-Santana               | USDA Forest Service, Northern Research Station, One Gifford Pinchot Dr, Madison, Wisconsin 53726, U.S.A.                                                                                                |
| Leticia Pacheco                     | Universidad Autónoma Metropolitana-Iztapalapa, Av. San Rafael Atlixco 186, Col. Vicentina, 09340 México, D. F., Mexico                                                                                  |
| Ferenc Pál-Fám                      | Faculty of Agricultural and Environmental Sciences, Kaposvar University, 7400 Kaposvar, Hungary                                                                                                         |
| Melissa Palacio                     | Universidade Federal do Rio Grande do Sul, Brazil                                                                                                                                                       |
| Zdeněk Palice                       | Faculty of Science, Charles University, Benátská 2, 128 01 Praha 2, Czech Republic                                                                                                                      |
| Viktor Papp                         | Szent Istvan University, 1118 Budapest, Menesi st. 44, Hungary                                                                                                                                          |
| Kadri Pärtel                        | Institute of Ecology and Earth Sciences, 40 Lai Street, Tartu 51005, Estonia                                                                                                                            |
| Julia Pawlowska                     | Faculty of Biology, Biological and Chemical Research Centre, University of Warsaw, Żwirki i Wigury 101, 02-089 Warsaw, Poland                                                                           |
| Aurelia Paz                         | Urb. La Llosa, 219, 39509 Villanueva de la Peña, Mazcuerras, Cantabria, Spain                                                                                                                           |
| Ursula Peintner                     | Institut für Mikrobiologie, Universität Innsbruck, Technikerstraße 25, 6020 Innsbruck, Austria                                                                                                          |
| Shaun Pennycook                     | Manaaki Whenua Landcare Research, Private Bag 92170, Auckland 1072, New Zealand                                                                                                                         |
| Olinto Liparini Pereira             | Universidade Federal de Viçosa, 36570-000, Viçosa, Minas Gerais, Brazil                                                                                                                                 |
| Pablo Pérez Daniëls                 | University of Córdoba, 14071, Córdoba, Spain                                                                                                                                                            |
| Miquel À. Pérez-De-Gregorio Capella | C/ Pau Casals, 6, 1 <sup>a</sup> , 1 <sup>a</sup> , 17001, Girona, Spain                                                                                                                                |
| Carlos Manuel Pérez del Amo         | C/ Luis de Ulloa, 1, 7 <sup>a</sup> I, 26004 Logroño, Navarra, Spain                                                                                                                                    |
| Sergio Pérez Gorjón                 | Universidad de Salamanca, Avda. Licenciado Mendez Nieto s/n, 37007 Salamanca, Spain                                                                                                                     |
| Sergio Pérez-Ortega                 | Real Jardín Botánico-CSIC, Plaza de Murillo 2, 28014, Madrid, Spain                                                                                                                                     |
| Israel Pérez-Vargas                 | Facultad de Farmacia, Universidad de La Laguna, c/ Astrofísico Sánchez s/n 38071 La Laguna, Tenerife, Canary Islands, Spain                                                                             |
| Brian A. Perry                      | California State University East Bay, Hayward, California 94542, U.S.A.                                                                                                                                 |
| Jens H. Petersen                    | Nøruplundvej 2, 8400 Ebeltoft, Denmark                                                                                                                                                                  |
| Ronald H. Petersen                  | University of Tennessee, Knoxville, Tennessee 37996, U.S.A.                                                                                                                                             |
| Donald H. Pfister                   | Harvard University, 22 Divinity Avenue, Cambridge MA 02138, U.S.A.                                                                                                                                      |
| Chayanard Phukhamsakda              | Mae Fah Luang University, Chang Wat Chiang Rai 57100, Thailand                                                                                                                                          |
| Marcin Piątek                       | W. Szafer Institute of Botany, Polish Academy of Sciences, Lubicz 46, 31-512 Krakow, Poland                                                                                                             |
| Meike Piepenbring                   | Faculty of Biosciences, Goethe University Frankfurt am Main, Germany                                                                                                                                    |
| Raquel Pino-Bodas                   | Real Jardín Botánico-CSIC, Plaza de Murillo 2, 28014, Madrid, Spain                                                                                                                                     |
| Juan Pablo Pinzón Esquivel          | Universidad Autónoma de Yucatán, Carretera Mérida-Xmatkuil Km. 15.5, Apdo. Postal: 4-116 Itzimmá, C.P: 97100, Merida, Yucatan, Mexico                                                                   |
| Paul Pirot                          | Rue des Peupliers 10, 6840 Neufchâteau, Belgium                                                                                                                                                         |
| Eugene S. Popov                     | Komarov Botanical Institute of the Russian Academy of Sciences, 2 Prof. Popov Street, St. Petersburg, 197376, Russia                                                                                    |
| Orlando Popoff                      | Instituto de Botánica del Nordeste, Universidad Nacional de Nordeste-Consejo Nacional de Investigaciones Científicas y Técnicas, Sargento Cabral 2131, CC 209, Corrientes Capital, Argentina            |
| María Prieto Álvaro                 | Universidad Rey Juan Carlos, 28933 Móstoles, Madrid, Spain                                                                                                                                              |
| Christian Printzen                  | Senckenberg Forschungsinstitut und Naturmuseum Frankfurt, Abteilung Botanik und Molekulare Evolutionsforschung, Herbarium Senckenbergianum (FR), Senckenberganlage 25, 60325 Frankfurt am Main, Germany |
| Nadezhda Psurtseva                  | Komarov Botanical Institute of the Russian Academy of Sciences, 2 Prof. Popov Street, St. Petersburg, 197376, Russia                                                                                    |
| Witoon Purahong                     | Helmholtz Centre for Environmental Research GmbH - UFZ, Theodor-Lieser-Straße 4, 06120 Halle, Germany                                                                                                   |
| Luis Quijada                        | Harvard University, 22 Divinity Avenue, Cambridge, Massachusetts 02138, U.S.A.                                                                                                                          |
| Gerhard Rambold                     | University of Bayreuth, Universitätsstrasse 30, 95447 Bayreuth, Germany                                                                                                                                 |
| Natalia A. Ramírez                  | Instituto de Botánica del Nordeste, Universidad Nacional de Nordeste-Consejo Nacional de Investigaciones Científicas y Técnicas, Sargento Cabral 2131, CC 209, Corrientes Capital, Argentina            |
| Huzefa Raja                         | University of North Carolina at Greensboro, 435 Sullivan Science Building, PO Box 26170, Greensboro North Carolina 27402-6170, U.S.A.                                                                   |
| Olivier Raspé                       | Botanic Garden Meise, Nieuwelaan 38, 1860 Meise, Belgium                                                                                                                                                |

|                             |                                                                                                                                                                                               |
|-----------------------------|-----------------------------------------------------------------------------------------------------------------------------------------------------------------------------------------------|
| Tania Raymundo              | Escuela Nacional de Ciencias Biológicas, Instituto Politécnico Nacional, Prolongación de Carpio y Plan de Ayala s/n, Miguel Hidalgo, Santo Tomás, 11340 Ciudad de México, Mexico              |
| Martina Réblová             | Institute of Botany, Czech Academy of Sciences, Pruhonice, Czech Republic                                                                                                                     |
| Yury A. Rebriev             | Southern Scientific Center, Russian Academy of Sciences, 41 Chehova str., Rostov-on-Don, 344006, Russia                                                                                       |
| Juan de Dios Reyes García   | Paseo Virgen de Linares 6 2 D, Linares, Jaen, Spain                                                                                                                                           |
| Miguel Ángel Ribes Ripoll   | Avda. Pablo Neruda 120 F, 2ºD, 28018 Madrid, Spain                                                                                                                                            |
| Franck Richard              | CEFE UMR5175, CNRS, Université de Montpellier, Université Paul-Valéry Montpellier, EPHE, INSERM, 1919 Route de Mende, 34293 Montpellier Cédex 5, France                                       |
| Mike J. Richardson          | Royal Botanic Garden Edinburgh, 20A Inverleith Row, Edinburgh, EH3 5LR, United Kingdom                                                                                                        |
| Víctor J. Rico              | Facultad de Farmacia, Universidad Complutense de Madrid, 28040 Madrid, Spain                                                                                                                  |
| Gerardo Lucio Robledo       | Instituto Multidisciplinario de Biología Vegetal, Consejo Nacional de Investigaciones Científicas y Técnicas, Universidad Nacional de Córdoba, Casilla de Correo 495, 5000 Córdoba, Argentina |
| Flavia Rodrigues Barbosa    | Universidade Federal de Mato Grosso, Av. Alexandre Ferronato, 1200, Setor Industrial, Sinop, Mato Grosso, Brazil                                                                              |
| Cristina Rodriguez-Caycedo  | UT Southwestern Medical Center, Dallas, Texas 75390, U.S.A.                                                                                                                                   |
| Pamela Rodriguez-Flakus     | W. Szafer Institute of Botany, Polish Academy of Sciences, Lubicz 46, 31-512 Krakow, Poland                                                                                                   |
| Anna Ronikier               | W. Szafer Institute of Botany, Polish Academy of Sciences, Lubicz 46, 31-512 Krakow, Poland                                                                                                   |
| Luis Rubio Casas            | Ul. Andrieja Sacharowa 1/1, 30-806 Kraków, Poland                                                                                                                                             |
| Katerina Rusevska           | Institute of Biology, Faculty of Natural Science and Mathematics, Ss. Cyril and Methodius University, Arhimedova 5, 1000 Skopje, Republic of Macedonia                                        |
| Günter Saar                 | Dammenmühle 7, 77933 Lahr-Sulz, Germany                                                                                                                                                       |
| Irja Saar                   | Institute of Ecology and Earth Sciences, 40 Lai Street, Tartu 51005, Estonia                                                                                                                  |
| Isabel Salcedo              | University of the Basque Country (UPV/EHU), Apdo 644, 48080 Bilbao, Spain                                                                                                                     |
| Sergio M. Salcedo Martínez  | Facultad de Ciencias Biológicas, UANL. Ave. Pedro de Alba s/n esq. Manuel Barragán Cd. Universitaria, San Nicolás de los Garza Nuevo León, CP. 66451, Mexico                                  |
| Carlos A. Salvador Montoya  | Instituto de Botánica del Nordeste, Universidad Nacional de Nordeste-Consejo Nacional de Investigaciones Científicas y Técnicas, Sargento Cabral 2131, CC 209, Corrientes Capital, Argentina  |
| Santiago Sánchez-Ramírez    | University of Toronto, 100 Queen's Park, Toronto, Ontario M5S 2C6, Canada                                                                                                                     |
| J. Vladimir Sandoval-Sierra | Health Science Centre, University of Tennessee, U.S.A.                                                                                                                                        |
| Sergi Santamaria            | Facultat de Biociències, Edifici C, Despatx C1/331, Campus de la UAB, 08193 Bellaterra, (Cerdanyola del Vallès), Barcelona, Spain                                                             |
| Josiane Santana Monteiro    | Botany Coordination, Museu Paraense Emílio Goeldi, 66077-830, Belém, Pará, Brazil                                                                                                             |
| Hans Josef Schroers         | Agricultural Institute of Slovenia, Hacquetova ulica 17, 1000 Ljubljana, Slovenia                                                                                                             |
| Barbara Schulz              | Institute of Microbiology, Technische Universität Braunschweig, Germany                                                                                                                       |
| Geert Schmidt-Stohn         | Burgstr. 25, 29553 Bienenbüttel, Germany                                                                                                                                                      |
| Trond Schumacher            | University of Oslo, P.O.Box 1066, Blindern, 0316 Oslo, Norway                                                                                                                                 |
| Beatrice Senn-Irlt          | RU Biodiversity and Conservation Biology, Swiss Federal Institute for Forest, Snow and Landscape Research WSL, Zürcherstr. 111, 8903 Birmensdorf, Switzerland                                 |
| Hana Ševčíková              | Moravian Museum, Zeny trh 6, 659 37 Brno, Czech Republic                                                                                                                                      |
| Oleg Shchepin               | Komarov Botanical Institute of the Russian Academy of Sciences, 2 Prof. Popov Street, St. Petersburg, 197376, Russia                                                                          |
| Takashi Shirouzu            | Graduate School of Bioresources, Mie University, 1577 Kurima-machiya, Tsu, Mie 514-8507, Japan                                                                                                |
| Anton Shiryayev             | Institute of Plant & Animal Ecology Ural Branch of the Russian Academy of Sciences, 620144 Ekaterinburg, 8 March str., 202/3, Russia                                                          |
| Klaus Siepe                 | Geeste 133, 46342 Velen, Germany                                                                                                                                                              |
| Esteban B. Sir              | Fundación Miguel Lillo, Consejo Nacional de Investigaciones Científicas y Técnicas, Miguel Lillo 251, San Miguel de Tucumán 4000, Tucumán, Argentina                                          |
| Mohammad Sohrabi            | Iranian Research Organization for Science and Technology, P.O. Box 33535111, Tehran, Iran                                                                                                     |
| Karl Soop                   | Swedish Museum of Natural History, P.O. Box 50007, 104 05 Stockholm, Sweden                                                                                                                   |
| Viacheslav Spirin           | Finnish Museum of Natural History, P.O. Box 7, 00014 University of Helsinki, Finland                                                                                                          |
| Toby Spribille              | University of Alberta, Edmonton, Alberta T6G 2R3, Canada                                                                                                                                      |
| Marc Stadler                | Helmholtz Centre for Infection Research, Inhoffenstrasse 7, 38124 Braunschweig, Germany                                                                                                       |
| Joost Stalpers              | Torenlaan 43, 3742CR Baarn, The Netherlands                                                                                                                                                   |
| Soili Stenroos              | Finnish Museum of Natural History, P.O. Box 7, 00014 University of Helsinki, Finland                                                                                                          |
| Ave Suija                   | Institute of Ecology and Earth Sciences, 40 Lai Street, Tartu 51005, Estonia                                                                                                                  |



|                            |                                                                                                                                                                                                                                                                 |
|----------------------------|-----------------------------------------------------------------------------------------------------------------------------------------------------------------------------------------------------------------------------------------------------------------|
| Stellan Sunhede            | Hökaskog Sandbacken 1, 533 92 Lundsbrunn, Sweden                                                                                                                                                                                                                |
| Sten Svantesson            | University of Gothenburg, Box 461, 40530 Göteborg, Sweden                                                                                                                                                                                                       |
| Sigvard Svensson           | Biological Museum, Lund University, Box 117, 221 00 Lund, Sweden                                                                                                                                                                                                |
| Tatyana Yu. Svetasheva     | (1) Komarov Botanical Institute of the Russian Academy of Sciences, 2 Prof. Popov Street, St. Petersburg, 197376, Russia; (2) Department of Technologies of Living Systems, Tula State Lev Tolstoy Pedagogical University, Lenin ave. 125, Tula, 300026, Russia |
| Krzysztof Świerkosz        | Museum of Natural History, Wrocław University, ul. H. Sienkiewicza 5, 50-335 Wrocław, Poland                                                                                                                                                                    |
| Heidi Tamm                 | Institute of Ecology and Earth Sciences, 40 Lai Street, Tartu 51005, Estonia                                                                                                                                                                                    |
| Hatira Taskin              | Faculty of Agriculture, University of Çukurova, 01330 Adana, Turkey                                                                                                                                                                                             |
| Adrien Taudière            | CEFE UMR5175, CNRS, Université de Montpellier, Université Paul-Valéry Montpellier, EPHE, INSERM, 1919 Route de Mende, 34293 Montpellier Cédex 5, France                                                                                                         |
| Jan-Olof Tedebrand         | Sundsvall Mycological Society, Medelpad, Sweden                                                                                                                                                                                                                 |
| Raúl Tena Lahoz            | C/Arreñales del Portillo B 21 1ºD, 44003 Teruel, Spain                                                                                                                                                                                                          |
| Marina Temina              | Institute of Evolution, University of Haifa, Aba Khoushi Ave. 199, Mt. Carmel, Haifa 3498838, Israel                                                                                                                                                            |
| Arne Thell                 | Biological Museum, Lund University, Box 117, 221 00 Lund, Sweden                                                                                                                                                                                                |
| Marco Thines               | Faculty of Biosciences, Goethe University Frankfurt am Main, Germany                                                                                                                                                                                            |
| Göran Thor                 | Swedish University of Agricultural Sciences, P. O. Box 7044, 750 07 Uppsala, Sweden                                                                                                                                                                             |
| Holger Thüs                | State Museum of Natural History Stuttgart, Rosenstein 1, 70191 Stuttgart, Germany                                                                                                                                                                               |
| Leif Tibell                | Evolutionary Biology Centre, Norbyvägen 18D, 75236 Uppsala, Sweden                                                                                                                                                                                              |
| Sanja Tibell               | Evolutionary Biology Centre, Norbyvägen 18D, 75236 Uppsala, Sweden                                                                                                                                                                                              |
| Einar Timdal               | Natural History Museum, University of Oslo, P.O. Box 1172 Blindern, 0318 Oslo, Norway                                                                                                                                                                           |
| Zdenko Tkalčec             | Ruđer Bošković Institute, Bijenička cesta 54, 10000 Zagreb, Croatia                                                                                                                                                                                             |
| Tor Tønnsberg              | University of Bergen, Allégaten 41, P.O. Box 7800, 5020 Bergen, Norway                                                                                                                                                                                          |
| Gérard Trichies            | 5, impasse des Écoles S7700 Neufchef, France                                                                                                                                                                                                                    |
| Dagmar Triebel             | Botanische Staatssammlung München, Menzinger Straße 67, 80638 München, Germany                                                                                                                                                                                  |
| Andrei Tsurukau            | (1) F. Skorina Gomel State University, Sovetskaja Str. 104, 246019 Gomel, Belarus; (2) Institute of Natural Sciences, Samara National Research University, Moskovskoye shosse 34, 443086 Samara, Russia                                                         |
| Rodham E. Tulloss          | Herbarium Amanitarum Rooseveltensis, P. O. Box 57, Roosevelt, New Jersey 08555-0057, U.S.A.                                                                                                                                                                     |
| Veera Tuovinen             | University of Alberta, Edmonton, Alberta T6G 2R3, Canada                                                                                                                                                                                                        |
| Miguel Ulloa Sosa          | Universidad Nacional Autónoma de México, Tercer Circuito/Sin Número, Ciudad Universitaria, Ciudad de México, C. P. 04510, Mexico                                                                                                                                |
| Carlos Urcelay             | Instituto Multidisciplinario de Biología Vegetal, Consejo Nacional de Investigaciones Científicas y Técnicas, Universidad Nacional de Córdoba, Casilla de Correo 495, 5000 Córdoba, Argentina                                                                   |
| François Valade            | 11 rue haras, le boqueteau, 91240 Saint-Michel-sur-Orge, France                                                                                                                                                                                                 |
| Ricardo Valenzuela Garza   | Escuela Nacional de Ciencias Biológicas, Instituto Politécnico Nacional, Prolongación de Carpio y Plan de Ayala s/n, Miguel Hidalgo, Santo Tomás, 11340 Ciudad de México, Mexico                                                                                |
| Pieter van den Boom        | Arafura 16, 5691 JA Son, The Netherlands                                                                                                                                                                                                                        |
| Nicolas Van Vooren         | Ascomycete.org, 36 rue de la Garde, 69005 Lyon, France                                                                                                                                                                                                          |
| Aida M. Vasco-Palacios     | Escuela de Microbiología, Universidad de Antioquia, AA1226, Fundación Biodiversa Colombia, Medellín, Colombia                                                                                                                                                   |
| Jukka Vauras               | Herbarium TUR, Biodiversity Unit, University of Turku, 20014 Turku, Finland                                                                                                                                                                                     |
| Juan Manuel Velasco Santos | 3 C/Pontevedra, 18, 1º C, 37003 Salamanca, Spain                                                                                                                                                                                                                |
| Else Vellinga              | 861 Keeler Avenue, Berkeley, California 94708, U.S.A.                                                                                                                                                                                                           |
| Annemieke Verbeken         | Ghent University, K.L. Ledeganckstraat 35, 9000 Gent, Belgium                                                                                                                                                                                                   |
| Per Vetlesen               | Norges Sopp- og Nyttevekstforbund, Schweigaards gate 34F, 0191 Oslo, Norway                                                                                                                                                                                     |
| Alfredo Vizzini            | University of Torino, Viale P.A. Mattioli 25, 10125, Torino, Italy                                                                                                                                                                                              |
| Hermann Voglmayr           | University of Vienna, Rennweg 14, 1030 Vienna, Austria                                                                                                                                                                                                          |
| Sergey Volobuev            | Komarov Botanical Institute of the Russian Academy of Sciences, 2 Prof. Popov Street, St. Petersburg, 197376, Russia                                                                                                                                            |
| Wolfgang von Brackel       | Kirchenweg 2, 91341 Röttenbach, Germany                                                                                                                                                                                                                         |
| Elena Voronina             | Lomonosov Moscow State University, Biology Faculty, Moscow, Russia                                                                                                                                                                                              |
| Grit Walther               | Arvid-Harnack-Str. 4, 07743 Jena, Germany                                                                                                                                                                                                                       |
| Roy Watling                | Royal Botanic Garden Edinburgh, 20A Inverleith Row, Edinburgh, EH3 5LR, United Kingdom                                                                                                                                                                          |
| Evi Weber                  | Blaihofstr. 42, 72074 Tübingen, Germany                                                                                                                                                                                                                         |
| Mats Wedin                 | Swedish Museum of Natural History, P.O. Box 50007, 104 05 Stockholm, Sweden                                                                                                                                                                                     |

|                      |                                                                                                                      |
|----------------------|----------------------------------------------------------------------------------------------------------------------|
| Øyvind Weholt        | Nord University, Nesna, 8700 Nesna, Norway                                                                           |
| Martin Westberg      | Museum of Evolution, Uppsala University, Norbyvägen 16, 75236 Uppsala, Sweden                                        |
| Eugene Yurchenko     | Polesky State University, Dnyaprouskai flatyiii str. 23, 225710, Pinsk, Belarus                                      |
| Petr Zehnálek        | Faculty of Science, Charles University, Benátská 2, 128 01 Praha 2, Czech Republic                                   |
| Huang Zhang          | Kunming University of Science & Technology, Kunming, China                                                           |
| Mikhail P. Zhurbenko | Komarov Botanical Institute of the Russian Academy of Sciences, 2 Prof. Popov Street, St. Petersburg, 197376, Russia |

The following institutions are also supporting the present text (institutional support means that committees from the mentioned

Asociación Micológica Carlos Spegazzini (Argentina)

Austrian Mycological Society (Austria)

Croatian Mycological Society (Croatia)

Committee of the Czech Scientific Society for Mycology (Czech Republic)

The Netherlands Mycological Society (The Netherlands)

Sociedad Española de Liqueología (Portugal/Spain)

Iberian Mycological Society (which is under constitution, Portugal/Spain)

Federación de Asociaciones Micológicas Andaluzas (FAMA) (Spain)

Asociación Botánica y Micológica de Jaén (Spain)

Asociación Micológica Hispalense Muscaria (Spain)

Societat Micològica Valenciana (Spain)
